# Supplementary material for: Magnetic polymerizable surfactants: thermotropic liquid crystal behaviors and construction of nanostructured films
Source: Royal Society of Chemistry journal article supplement (doi:10.1039/d0nj03029e), 2020-01-01
Supplement: d0nj03029e1.pdf [file d0nj03029e1.pdf]

*Electronic Supplementary Information (ESI)*

**Magnetic polymerizable surfactants: thermotropic liquid crystal behaviors and construction of nanostructured films**

Zhaohui Huang,<sup>a</sup> Mengjiao Yi,<sup>a</sup> Yihan Liu,<sup>a</sup> Ping Qi,<sup>a</sup> Aixin Song,<sup>\* a</sup> and Jingcheng Hao<sup>a</sup>

<sup>a</sup>Key Laboratory of Colloids and Interface Chemistry (Shandong University),  
Ministry of Education, Jinan 250100, China

\* Corresponding author:

[songaixin@sdu.edu.cn](mailto:songaixin@sdu.edu.cn); Phone: 0531-88363532; Fax: 0531-88564750

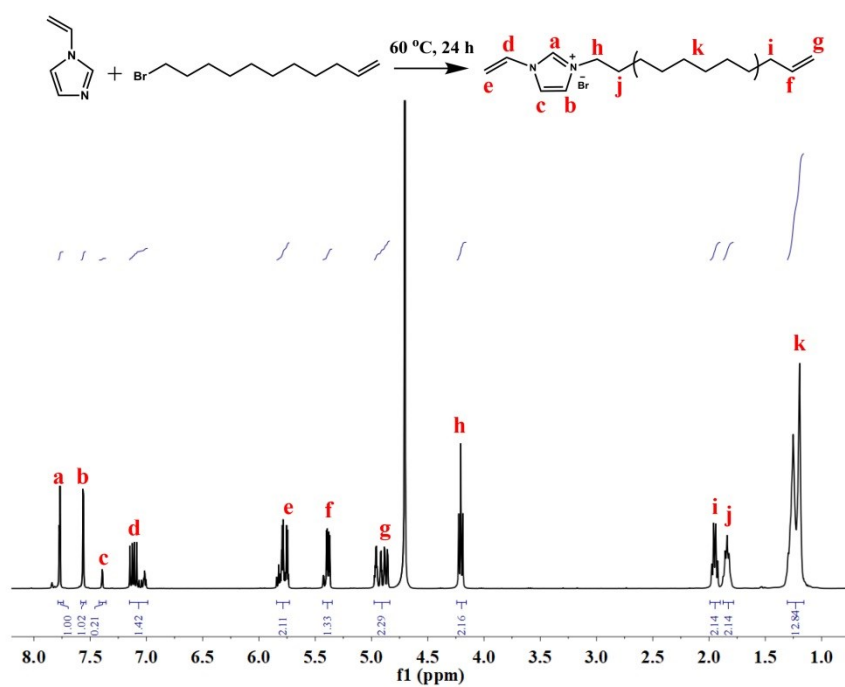

**Fig. S1**  $^1H$  NMR spectrum of  $C_{11}VIMBr$ .

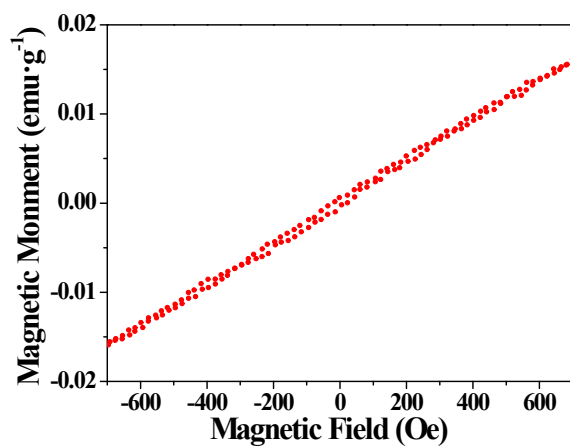

**Fig. S2** SQUID magnetometry of  $C_{12}VIMMn$  where a small “hysteresis loop” appeared.

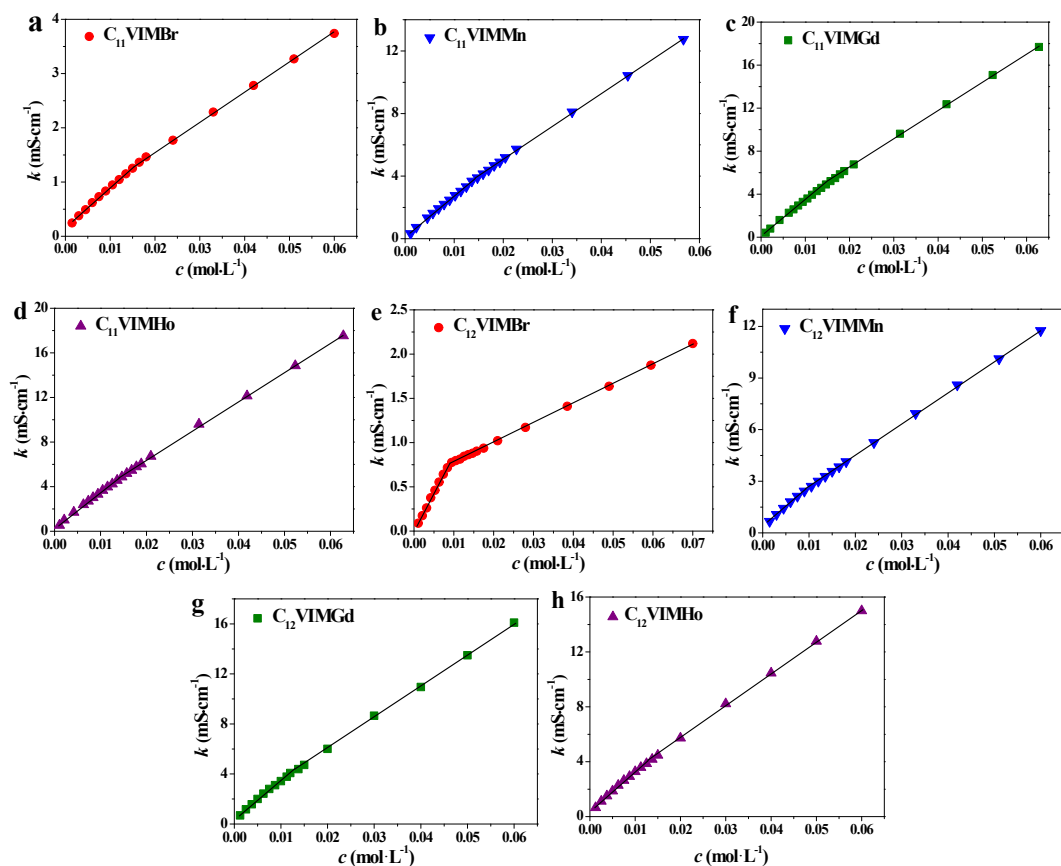

**Fig. S3** Electrical conductivity plots of six magnetic surfmers in aqueous solutions with different concentrations. The test temperature was  $25.0 \pm 0.1$  °C.

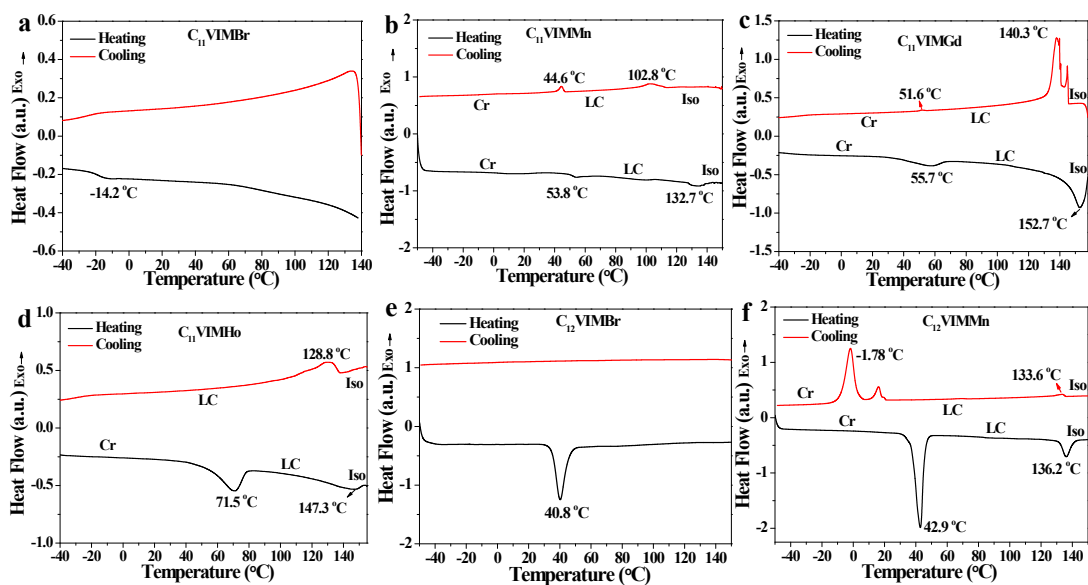

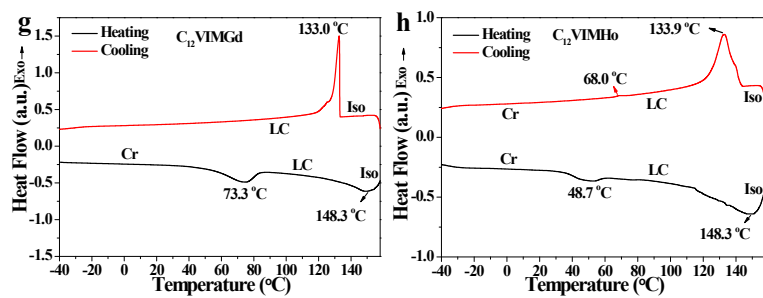

**Fig. S4** DSC curves of  $C_{11}$ VIMBr,  $C_{12}$ VIMBr and their corresponding magnetic surfmers.

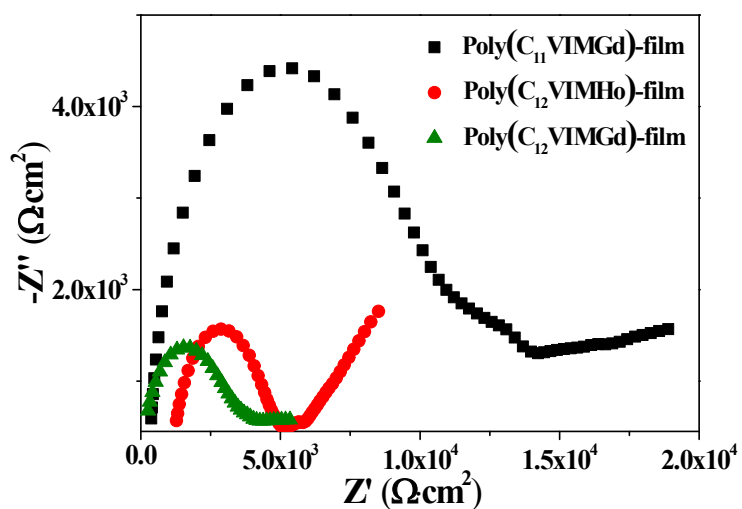

**Fig. S5** EIS results of the films composed of poly( $C_{11}$ VIMGd), poly( $C_{12}$ VIMHo) or poly( $C_{12}$ VIMGd).
